# Supplementary material
Source: publisher site journal article supplement (https://www.dovepress.com/article/371597)
Supplement: Supplementary file 1 [file get_supplementary_file.php]

**Table S1 Strains and plasmids used in this study**

| Strain(s) or Plasmid                 | Genotype or Phenotype                                                                                                                                  | Source or Reference |
|--------------------------------------|--------------------------------------------------------------------------------------------------------------------------------------------------------|---------------------|
| <b><i>E. coli</i> strains</b>        |                                                                                                                                                        |                     |
| DH5α                                 |                                                                                                                                                        | Lab stock           |
| DH5α-pUCP20- <i>ptrA</i>             | DH5α carrying pUCP20- <i>ptrA</i> plasmid                                                                                                              | This study          |
| <b><i>P. aeruginosa</i> strains</b>  |                                                                                                                                                        |                     |
| PAO1 Wild type                       |                                                                                                                                                        | Lab stock           |
| PAO1-pUCP-Red                        | PAO1 carrying pUCP-Red plasmid; Car <sup>r</sup>                                                                                                       | This study          |
| PAO1(Δ <i>ptrA</i> )                 | <i>ptrA</i> replacement mutant of PAO1; Gm <sup>r</sup>                                                                                                | This study          |
| PAO1(Δ <i>ptrA</i> -p- <i>ptrA</i> ) | PAO1(Δ <i>ptrA</i> ::Gm) complementation strain carrying pUCP20- <i>ptrA</i> plasmid; Car <sup>r</sup>                                                 | This study          |
| PAO1-pUCP20                          | PAO1 carrying pUCP20 plasmid; Car <sup>r</sup>                                                                                                         | This study          |
| PAO1(Δ <i>ptrA</i> )-pUCP20          | PAO1(Δ <i>ptrA</i> ) carrying pUCP20 plasmid; Car <sup>r</sup>                                                                                         | This study          |
| <b>Plasmids</b>                      |                                                                                                                                                        |                     |
| pJQ200SK                             | Gm <sup>r</sup> plasmid                                                                                                                                | Lab stock           |
| pUCP-Red                             | pUCP plasmid carrying Red recombinase gene (containing <i>exo</i> , <i>bet</i> and <i>gam</i> genes regulated by arabinose promoter); Car <sup>r</sup> | 1                   |
| pUCP20                               | Car <sup>r</sup>                                                                                                                                       | 2                   |
| pUCP20- <i>ptrA</i>                  | <i>ptrA</i> gene insertion in pUCP20 plasmid; Car <sup>r</sup>                                                                                         | This study          |

1. Xu X, Yu H, Zhang D, et al. Role of ppGpp in *Pseudomonas aeruginosa* acute pulmonary infection and virulence regulation. *Microbiol Res.* Nov 2016;192:84-95. doi:10.1016/j.micres.2016.06.005
  
2. Li K, Yang G, Debru AB, et al. SuhB Regulates the Motile-Sessile Switch in *Pseudomonas aeruginosa* through the Gac/Rsm Pathway and c-di-GMP Signaling. *Front Microbiol.* 2017;8:1045. doi:10.3389/fmicb.2017.01045

**Table S2 PCR and quantitative real-time PCR (qRT-PCR) primers used in this study.**

| <b>Gene</b>                              | <b>Sequence</b>                              | <b>Template</b>  | <b>Restriction enzymesite</b> |
|------------------------------------------|----------------------------------------------|------------------|-------------------------------|
| <i>ptrA</i> Knockout Up-F                | ATGCAAGCTTGGTTGAACTCGTGC<br>AACAGC           | PAO1 genome      | <i>Hind</i> III               |
| <i>ptrA</i> Knockout Up-R                | gcaaccttgggcagcagcGGACAAGGAAA<br>ACTGCTGATCG |                  |                               |
| Gm <sup>r</sup> -F                       | GCTGCTGCCCAAGGTTGC                           | pJQ200SK plasmid |                               |
| Gm <sup>r</sup> -R                       | CCGATCTCGGCTTGAACGA                          |                  |                               |
| <i>ptrA</i> Knockout Down-F              | tcgttcaagccgagatcggGCAGTGAAGGT<br>ACGCATGG   | PAO1 genome      | <i>EcoR</i> I                 |
| <i>ptrA</i> Knockout Down-R              | GCTAGAATTCCGCAGCAAATCGA<br>GTTTCGAG          |                  |                               |
| <i>ptrA</i> complementary verification-F | GGGGCGAGGACCAGCAGG                           | PAO1 genome      |                               |
| <i>ptrA</i> complementary verification-R | CACCGGTACGGTCATCCCG                          |                  |                               |
| Red-F                                    | ATTATGACAACTTGACGGCTAC                       | pUCP-Red plasmid |                               |
| Red-R                                    | TTCTTCGTCTGTTTCTACTGG                        |                  |                               |
| qRT-PCR primers                          |                                              |                  |                               |
| <i>exoS</i> -F                           | CTCTACACCGGCATTCATA                          | PAO1 genome      |                               |
| <i>exoS</i> -R                           | CTTCACTACCTGTTTCAGCCT                        |                  |                               |
| <i>exoT</i> -F                           | CATCTCAGCAGAACCCGTC                          | PAO1 genome      |                               |

|                 |                      |             |
|-----------------|----------------------|-------------|
| <i>exoT</i> -R  | CTCGATGATCGCCACGAAGG |             |
| <i>exsA</i> -F  | CTGGCGAGTTGCTTTTCGTC | PAO1 genome |
| <i>exsA</i> -R  | ACGCTCGACTTCACTCAACA |             |
| <i>lasA</i> -F  | CTACAGCATCAACCCGAAAG | PAO1 genome |
| <i>lasA</i> -R  | TAGCGCCGCGACAAC      |             |
| <i>lasB</i> -F1 | GTTCTATCCGCTGGTGTGCG | PAO1 genome |
| <i>lasB</i> -R1 | CGCTGCCCTTCTTGATG    |             |
| <i>rhlA</i> -F2 | GGCGATCGGCCATCT      | PAO1 genome |
| <i>rhlA</i> -R2 | AGCGAAGCCATGTGCTGAT  |             |
| <i>rhlB</i> -F  | AAGCGCATCTTCACCCAGT  | PAO1 genome |
| <i>rhlB</i> -R  | TGGCATAGAAGTCTCCCTGC |             |
| <i>pqsA</i> -F  | GACCGGCTGTATTCGATTC  | PAO1 genome |
| <i>pqsA</i> -F  | GCTGAACCAGGGAAAGAAC  |             |
| <i>pqsE</i> -F  | GATGATGACCTGTGCCTGTT | PAO1 genome |
| <i>pqsE</i> -R  | CGCCCAAACCAATTCGGCAT |             |
| <i>gacA</i> -F  | GTCTTCGGCGACAGGCAC   | PAO1 genome |
| <i>gacA</i> -R  | CTGAAGTCCTTCCAGCCG   |             |
| <i>rsmA</i> -F  | ATGCTGATTCTGACTCGTC  | PAO1 genome |
| <i>rsmA</i> -R  | GGATGCGCTGGTAAATTC   |             |
| <i>rsmY</i> -F  | AGGACATTGCGCAGGAAG   | PAO1 genome |

|                    |                      |             |
|--------------------|----------------------|-------------|
| <i>rsmY</i> -R     | TTTTGGGCGGGGTTTTGCA  |             |
| <i>rsmZ</i> -F     | CGTACAGGGAACACGCAAC  | PAO1 genome |
| <i>rsmZ</i> -R     | GTATTACCCCGCCCACTCTT |             |
| <i>16S rRNA</i> -F | GAGGAAGGTGGGGATGACGT | PAO1 genome |
| <i>16S rRNA</i> -F | AGGCCCGGGAACGTATTCAC |             |

---
